# Supplementary material
Source: PubMed Central journal article supplement (PMC6638659)

**Fig. S1.** Time course of salicylic acid accumulation at different distances from the point of BcSpl1 infiltration. This figure shows the raw chemiluminescence results from which the SA concentrations displayed in Fig. 4 were obtained.

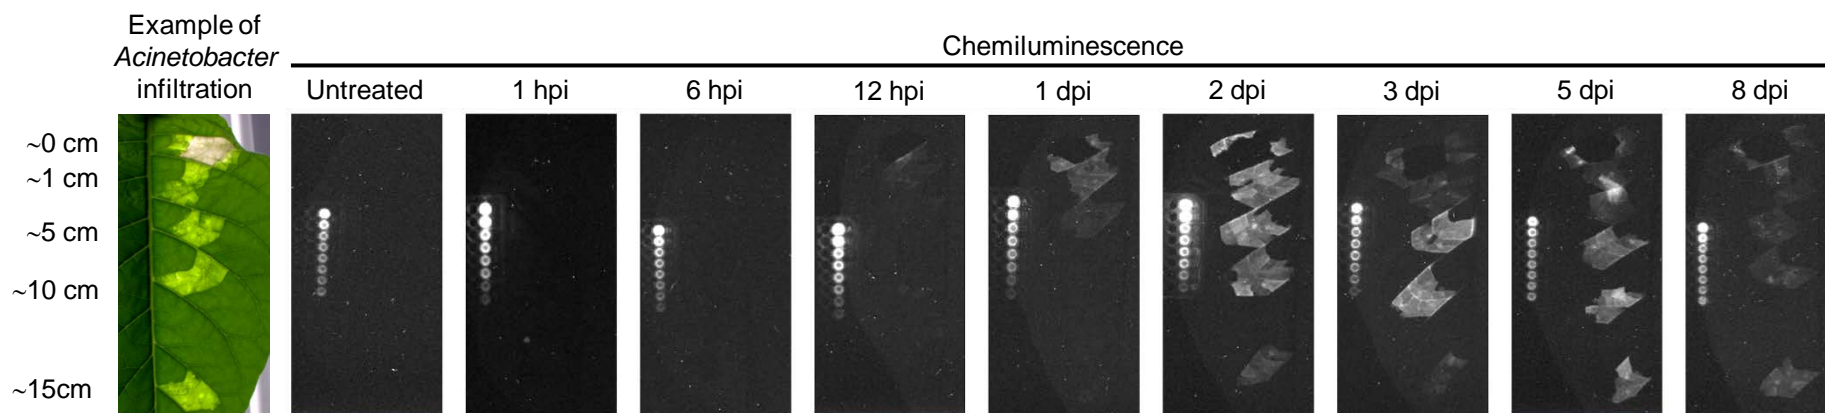

Supplement: MPP-14-191-s001.pdf [file MPP-14-191-s001.pdf]
